# Supplementary material
Source: HighWire-hosted journal article supplement (http://hw-f5-jim.highwire.org/highwire/filestream/138515/field_highwire_adjunct_files/0/AFMR_Award_Recipients_2021_69_4.pdf)
Supplement: AFMR_Award_Recipients_2021_69_4.pdf [file AFMR_Award_Recipients_2021_69_4.pdf]

## Congratulations to the AFMR Award Recipients from the Western Medical Research Conference & Southern Regional Meeting.

For more information and full details, visit [afmr.org/western](http://afmr.org/western) and [afmr.org/southern](http://afmr.org/southern)

### WAFMR/WSPR Joint Western Medical Research Conference | January 29-30, 2021

#### AFMR Henry Christian Award Recipient

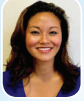

**Smooth Muscle Cell PIEZO1 in Small Bowel Contractility and Growth**  
 Geoanna Bautista  
 University of California Los Angeles

#### WAFMR Subspecialty Award Recipients

##### Neuroscience I

**SUPEROTEMPORAL RETINAL AMYLOID  
 IMAGING SIGNALS PATHOLOGIC  
 NEURODEGENERATION AND MEMORY  
 DEFICITS IN SUBJECTS WITH COGNITIVE  
 DECLINE**

Tania Torbati  
 Western University of Health Sciences College  
 of Osteopathic Medicine of the Pacific,  
 Cedars-Sinai Medical Center

##### Immunology and Rheumatology

**NOVEL CORONA VIRUS PANDEMIC- 2019  
 AND PATIENT EXPERIENCE COMPARING  
 TELEMEDICINE WITH CONVENTIONAL  
 CLINIC VISIT IN PATIENTS WITH JUVENILE  
 IDIOPATHIC ARTHRITIS AND CHILDHOOD  
 SYSTEMIC LUPUS ERYTHEMATOSUS**

Theodore Gross  
 Valley Children's Hospital

##### Infectious Diseases I

**RE-EMERGENCE OF ARBOVIRUS DISEASES  
 IN THE STATE OF RIO DE JANEIRO, BRAZIL  
 2014-2019**

Olivia Man  
 University of California Los Angeles David  
 Geffen School of Medicine

##### Hematology and Oncology

**CDK8-MEDIATOR COMPLEX PLAYS  
 POSITIVE TRANSCRIPTIONAL ROLE IN  
 MYC-AMPLIFIED MEDULLOBLASTOMA**

Caitlin Ritz  
 University of Colorado

##### Surgery I

**SIMULATION OF POST-PROCEDURAL  
 COMPRESSION ON AUTOLOGOUS FAT  
 GRAFTS: A PILOT STUDY**

Hannah Peterson  
 Loma Linda University School of Medicine

##### Pulmonary and Critical Care

**HYPERGLYCEMIA AND HYPOGLYCEMIA  
 CONTRIBUTIONS TO ACUTE RESPIRATORY  
 DISTRESS SYNDROME**

Jonathan Repine  
 University of Colorado

##### Cardiovascular I

**CARDIAC SODIUM/CALCIUM EXCHANGER  
 IS NECESSARY FOR NORMAL  
 ATRIOVENTRICULAR NODE FUNCTION**

Adina Hazan  
 Cedars-Sinai Medical Center

##### COVID - Infectious Diseases II

**EFFECTS OF COVID-19 ON MORBIDITY  
 AMONGST PATIENTS WITH PRE-EXISTING  
 ASTHMA IN THE CENTRAL VALLEY  
 DURING THE EARLY PANDEMIC**

Amitoj Singh  
 University of California San Francisco

##### COVID - Infectious Diseases II

**INCORRECT FACE MASK USE AND  
 POTENTIAL COVID-19 EXPOSURES IN  
 PUBLIC LOCATIONS**

Dana Button  
 Oregon Health & Science University

##### Cardiovascular, Nephrology and

**Hypertension  
 AGE-SPECIFIC ASSOCIATION BETWEEN  
 STANDING HEIGHT AND PULSE PRESSURE  
 IN ADULTS**

Pranay Maniar  
 New Jersey Institute of Technology

##### Endocrinology and Metabolism II

**AN INVESTIGATION OF DIET QUALITY  
 AND HYPOTHALAMIC GLIOSIS IN  
 CHILDHOOD OBESITY**

Sarah Kee  
 University of Washington

### Southern Regional Meeting | February 25-27, 2021

#### AFMR Henry Christian Award Recipients

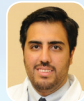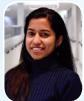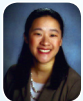

Mohammed Alsagoff, Ochsner Health System, King Abdulaziz University  
 Arya Mariam Roy, University of Arkansas for Medical Sciences  
 Malinda Wu, Emory University School of Medicine, Children's Healthcare of Atlanta

#### SAFMR/SSCI Junior Faculty Research Award

Aleli Campbell  
 Antoine Chaanine  
 Yusuke Higashi  
 Alexander Philipovskiy

Manavjot Sidhu  
 Zanthia Wiley  
 Tadashi Yoshida

#### SAFMR/SSCI Student Research Award

Patrick Boddie  
 Michael Craig  
 Edgard Cruz  
 Macy Cummins  
 Fatima El-Ghazali  
 Ali Esmaili

Daniel Gottlieb  
 Marah Hamdan  
 Carl Haupt  
 Vivian Jaber  
 John Paul Khouzam  
 Alla Kozubenko

Xinyi Luo  
 Matthew McMullan  
 Khoa Nguyen  
 Emily Pemberton  
 Owen Richfield  
 Namrata Shivaprakash

Patricia Snarski  
 Madilyn Tomaso  
 Aayush Visaria  
 Joseph Walker

#### SAFMR/SSCI Trainee Research Award

John Abdelmalek  
 Ashwin Ajith  
 Felix Aponte Santos  
 Ryan Coultas  
 Mohamed Elmassry  
 Marcus Juan Esteban  
 Farshid Etaee  
 Gian Galura  
 Arsalan Hamid  
 Usman Hasnie  
 Randa Hazam

Nicholas Helmstetter  
 Naoki Iwanaga  
 Prarthana Jain  
 M Ammar Kalas  
 Shoaib Khan  
 Radia Ksayer  
 Naji Maaliki  
 Jonathan Martinez  
 Miguel Maturana  
 Hemendra Mhadgut  
 Sebastian Mikulic

Arunee Motes  
 Kandasamy Neelamegam  
 Ina Nikolli  
 Alex Niu  
 Adebamike Oshunbade  
 Jasmine Padgett  
 Khalid Pasha  
 Ronak Patel  
 Ellen Petryna  
 Jennifer Pham  
 Jennifer Prevot

Khalid Sawalha  
 Loyal Sayegh  
 Tanya Sharma  
 Jessica Simon  
 Juliana Sitta  
 Alan Sun  
 Saria Tasnim  
 Akesh Thomas  
 Vipin Varghese  
 Aditi Varma-Doyle  
 Myrian Vinan Vega

#### SSCI/SAFMR Presidential Poster of Distinction

Lorry Aitkens  
 Pablo Altieri  
 Ankur Aneja  
 Martha Arrieta  
 Kelsey Baab

Brandon Bunch  
 Asra Butt  
 Krishna Desai  
 Austin Jones  
 Sayed Reshad Ghafouri

Sally McClung  
 Hemanth Nannapaneni  
 Saihariharan Nedunchezian  
 Hao Nguyen  
 Joel Raja

Sanjana Rao  
 Shanna Rolfs  
 Esha Singhal
